# Supplementary material for: Fibroblast growth factor–inducible 14 regulates satellite cell self-renewal and expansion during skeletal muscle repair
Source: JCI journal article supplement (doi:10.1172/jci.insight.187825), 2025-01-28

# UNEDITED GEL IMAGES

## Full unedited gels for Figure 5G

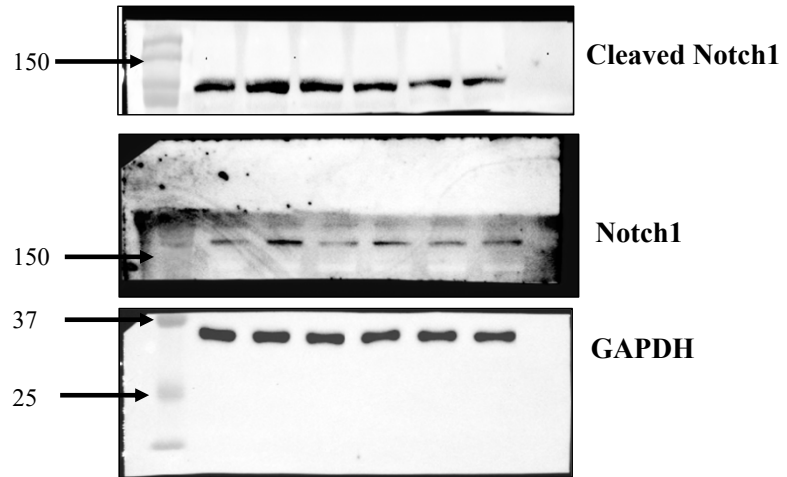

## Full unedited gels for Figure 6B

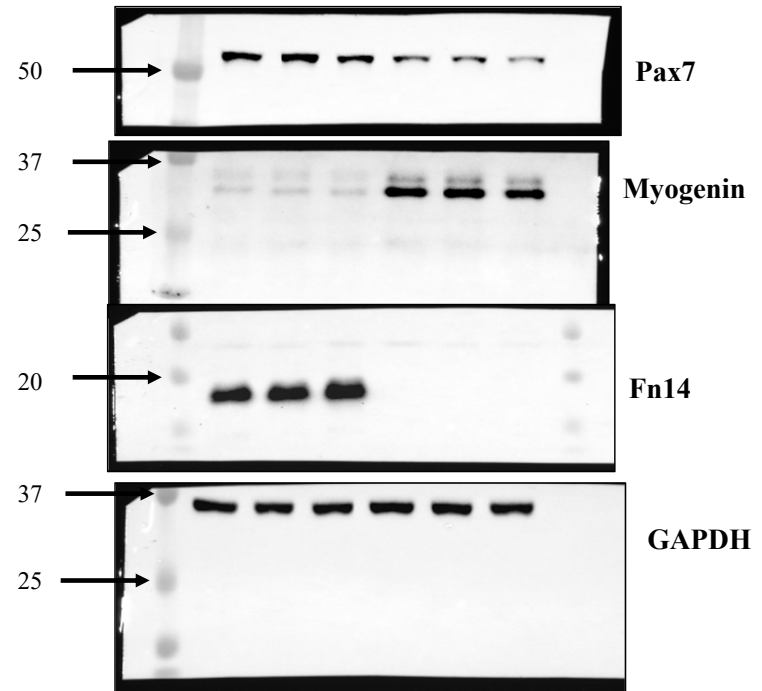

Full unedited gels for Figure 7B

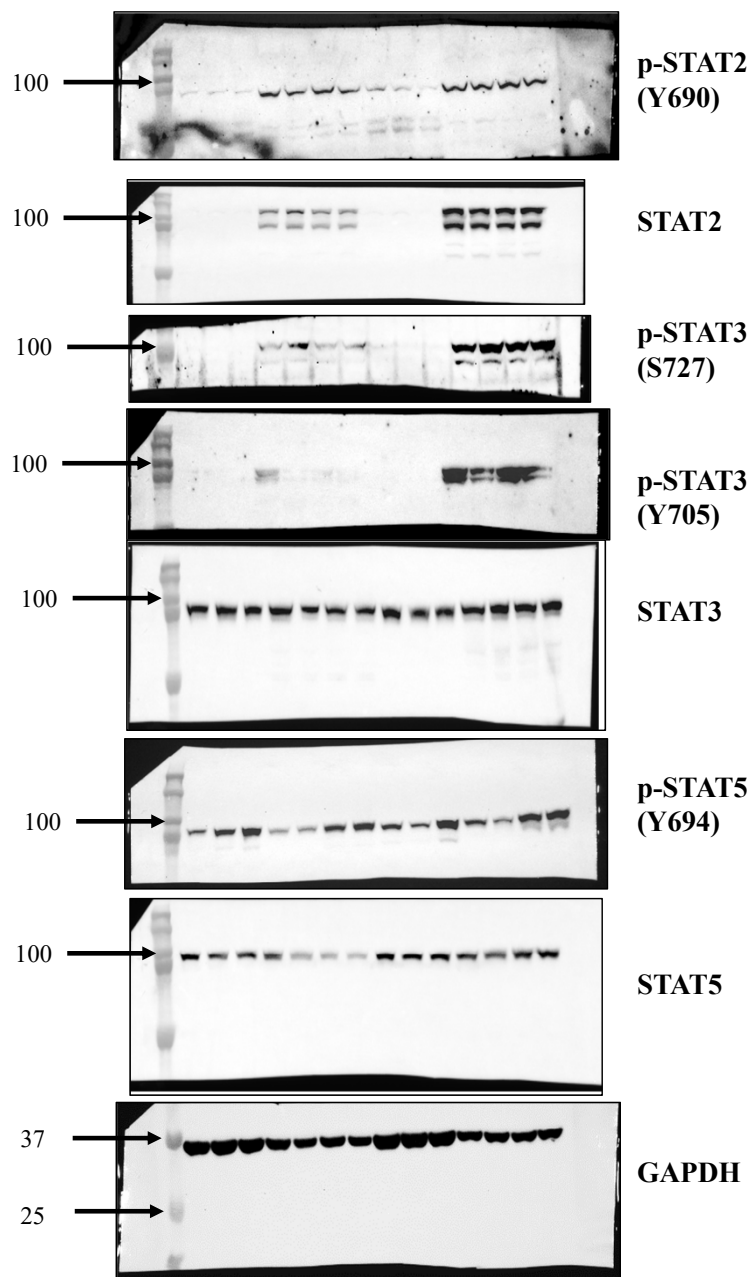

Full unedited gels for Figure 7C

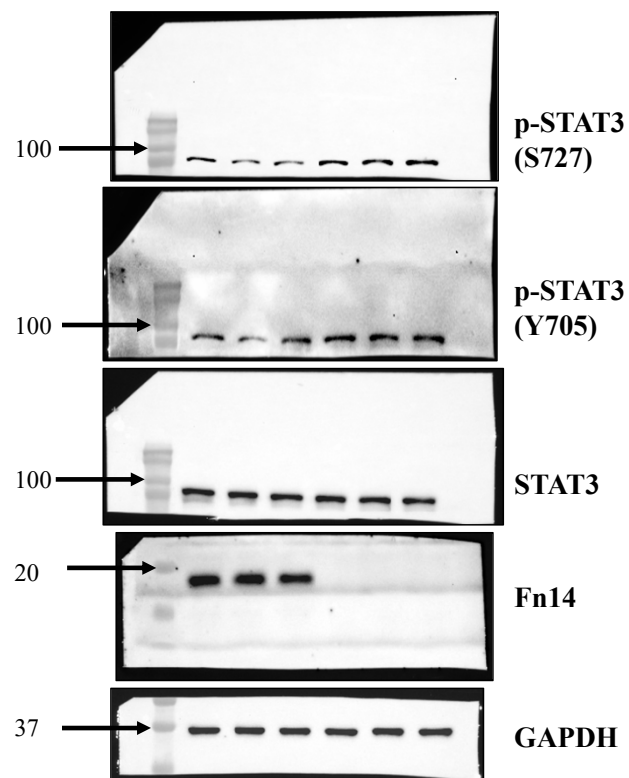

**Full unedited gels for Figure 7F**

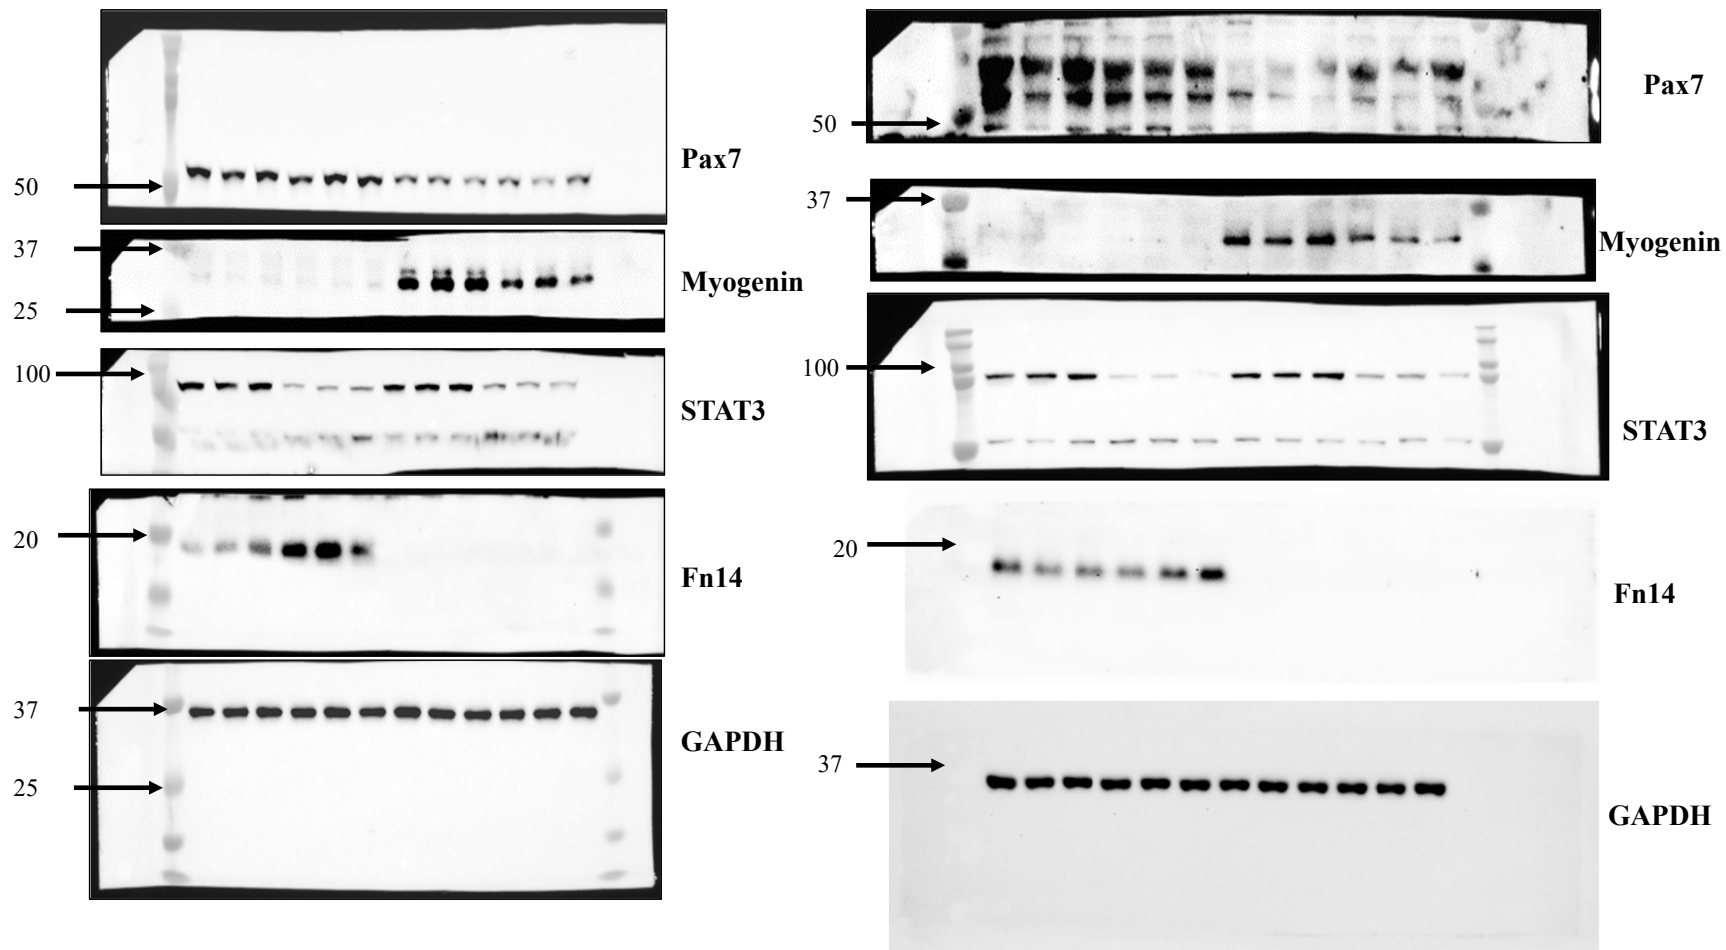

**Full unedited gels for Figure 9A**

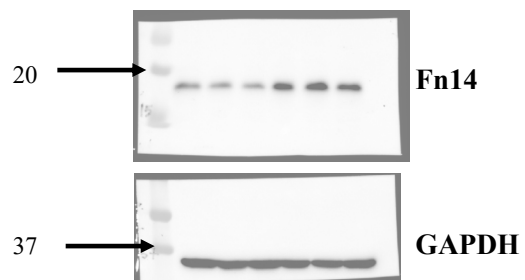

Supplement: sd2 [file 2]
